# Supplementary material for: Influence of anions on the synthesis of Cu(i)-based coordination polymers along with a series of derived materials for selective photocatalytic properties
Source: Royal Society of Chemistry journal article supplement (doi:10.1039/d3me00047h), 2023-01-01
Supplement: d3me00047h1.pdf [file d3me00047h1.pdf]

## Supporting Information

### Anion influence on synthesis of Cu(I)-based coordination polymers along with a series of derived materials for the selective photocatalysis properties

Xiao-Sa Zhang,<sup>a</sup> Jia-Liang Cui,<sup>a</sup> Yu Liu,<sup>a</sup> Wen-Ze Li,<sup>\*a</sup> Yan Liu,<sup>a</sup> Hong Xiang,<sup>a</sup>  
Jian Luan<sup>\*b</sup>

<sup>a</sup> College of Science, Shenyang University of Chemical Technology, Shenyang, 110142, P. R. China

<sup>b</sup> College of Sciences, Northeastern University, Shenyang, 110819, P. R. China

E-mails: [liwENZE@syuct.edu.cn](mailto:liwENZE@syuct.edu.cn); [2010044@stu.neu.edu.cn](mailto:2010044@stu.neu.edu.cn)

**Table S1** Selected bond distances (Å) and angles (°) for CP 1.

|                  |           |                     |           |
|------------------|-----------|---------------------|-----------|
| Cu(1)–N(1)       | 2.031(2)  | Cu(1)–Cl(1)         | 2.3836(8) |
| Cu(1)–N(2)       | 2.046(2)  | Cu(1)–Cl(1)#1       | 2.4240(8) |
| N(1)–Cu(1)–N(2)  | 112.68(8) | N(1)–Cu(1)–Cl(1)#1  | 106.17(7) |
| N(1)–Cu(1)–Cl(1) | 117.17(7) | N(2)–Cu(1)–Cl(1)#1  | 110.97(7) |
| N(2)–Cu(1)–Cl(1) | 105.96(6) | Cl(1)–Cu(1)–Cl(1)#1 | 103.52(3) |

Symmetry code: #1  $-x, -y, -z$ .

**Table S2** Selected bond distances (Å) and angles (°) for CP 2.

|                     |            |                   |           |
|---------------------|------------|-------------------|-----------|
| Cu(1)–N(1)          | 1.9239(17) | Cu(1)–O(1)#1      | 2.438(2)  |
| Cu(1)–N(1)#1        | 1.9239(17) | Cu(1)–O(1)        | 2.438(2)  |
| N(1)–Cu(1)–N(1)#1   | 156.16(10) | N(1)–Cu(1)–O(1)   | 96.28(8)  |
| N(1)–Cu(1)–O(1)#1   | 105.29(8)  | N(1)#1–Cu(1)–O(1) | 105.29(8) |
| N(1)#1–Cu(1)–O(1)#1 | 96.28(8)   | O(1)#1–Cu(1)–O(1) | 50.70(10) |

Symmetry code: #1  $-x - 1/2, -y + 2, z$ .

## Supporting Information

**Table S3** Hydrogen bonding geometries (Å, °) of CPs **1** and **2**.

| CP       | D–H···A                        | D–H  | H···A | D···A  | D–H···A |
|----------|--------------------------------|------|-------|--------|---------|
| <b>1</b> | C3–H3A···O2 <sup>a</sup>       | 0.93 | 2.53  | 3.2468 | 134     |
|          | O1W–H1WA···N4 <sup>b</sup>     | 0.85 | 2.06  | 2.9055 | 171     |
|          | O1W–H1WB···C11 <sup>c</sup>    | 0.85 | 2.62  | 3.4711 | 178     |
| <b>2</b> | N(2)–H(2B)···O(3) <sup>d</sup> | 0.86 | 2.14  | 2.9410 | 155     |
|          | C(2)–H(2A)···O(1) <sup>e</sup> | 0.93 | 2.58  | 3.2573 | 130     |

Symmetry codes: <sup>a</sup> 1 – x, –y, 1 – z; <sup>b</sup> 1 – x, 1 – y, 1 – z; <sup>c</sup> 1 – x, –y, –z; <sup>d</sup> x, 1 + y, z; <sup>e</sup> 1 – x, 1 + y, 1/2 – z.

**Table S4** Organic dyes with different charge types and sizes.

| Dye                       | Formula                                                                             | Charge type | Size (nm × nm × nm)   |
|---------------------------|-------------------------------------------------------------------------------------|-------------|-----------------------|
| Methylene<br>Blue<br>(MB) | 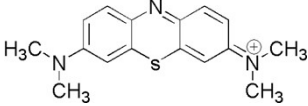   | Cationic    | 0.40 × 0.79 ×<br>1.63 |
| Rhodamine B<br>(RhB)      |  | Cationic    | 0.68 × 1.18 ×<br>1.57 |
| Gentian Violet<br>(GV)    |  | Cationic    | 0.40 × 1.30 ×<br>1.37 |
| Methyl<br>Orange<br>(MO)  |  | Anionic     | 0.53 × 0.73 ×<br>1.74 |
| Congo Red<br>(CR)         |  | Anionic     | 0.39 × 0.86 ×<br>2.61 |

## Supporting Information

**Table S5** Comparison of photodegradation efficiency of different materials for GV.

| Material                                           | Dosage<br>(mg) | Irradiation time<br>(min) | Degradation efficiency<br>(%) | Reference |
|----------------------------------------------------|----------------|---------------------------|-------------------------------|-----------|
| TiO <sub>2</sub> P25                               | 1000           | 30                        | 100                           | S1        |
| C-V-1                                              | 5              | 30                        | 99.01                         | S2        |
| Cu@TiO <sub>2</sub>                                | 5              | 240                       | 99.51                         | S3        |
| TiO <sub>2</sub> /CoFe <sub>2</sub> O <sub>4</sub> | 5              | 180                       | 83.00                         | S4        |
| Ni-CP@FA-1000                                      | 5              | 240                       | 100                           | S5        |
| Cu/CuO@C                                           | 10             | 240                       | 93.22                         | S6        |
| <b>Cu@N-1</b>                                      | 5              | 240                       | 97.79                         | This work |

### References:

- S1 S. Bendjabeur, R. Zouaghi, O. N. H Kaabeche and T. Sehili, *Int. J. Chem. React. Eng.*, 2017, **15**, 20160206.
- S2 X. S. Zhang, H. T. Zhao, Y. Liu, W. Z. Li, A. A. Yang and J. Luan, *Dalton Trans.*, 2021, **50**, 18173–18185.
- S3 Y. Q. Zhang, N. Xu, Y. Liu, X. S. Zhang, W. Z. Li, H. T. Zhao and J. Luan, *RSC Adv.*, 2022, **12**, 9363–9372.
- S4 I. Ibrahim, G. V. Belessiotis, A. M. Elseman, M. M. Mohamed, Y. Ren, T. M. Salama and M. B. I. Mohamed, *Nanomaterials*, 2022, **12**, 3290.
- S5 Y. X. Li, W. L. Duan, J. Luan and F. Guo, *Inorg. Chim. Acta*, 2023, **549**, 121418.
- S6 W. L. Duan, X. Liu, J. Luan, G. R. Jiao, Z. Y. Jiang and F. Yan, *J. Solid State Chem.*, 2023, **322**, 123995.

## Supporting Information

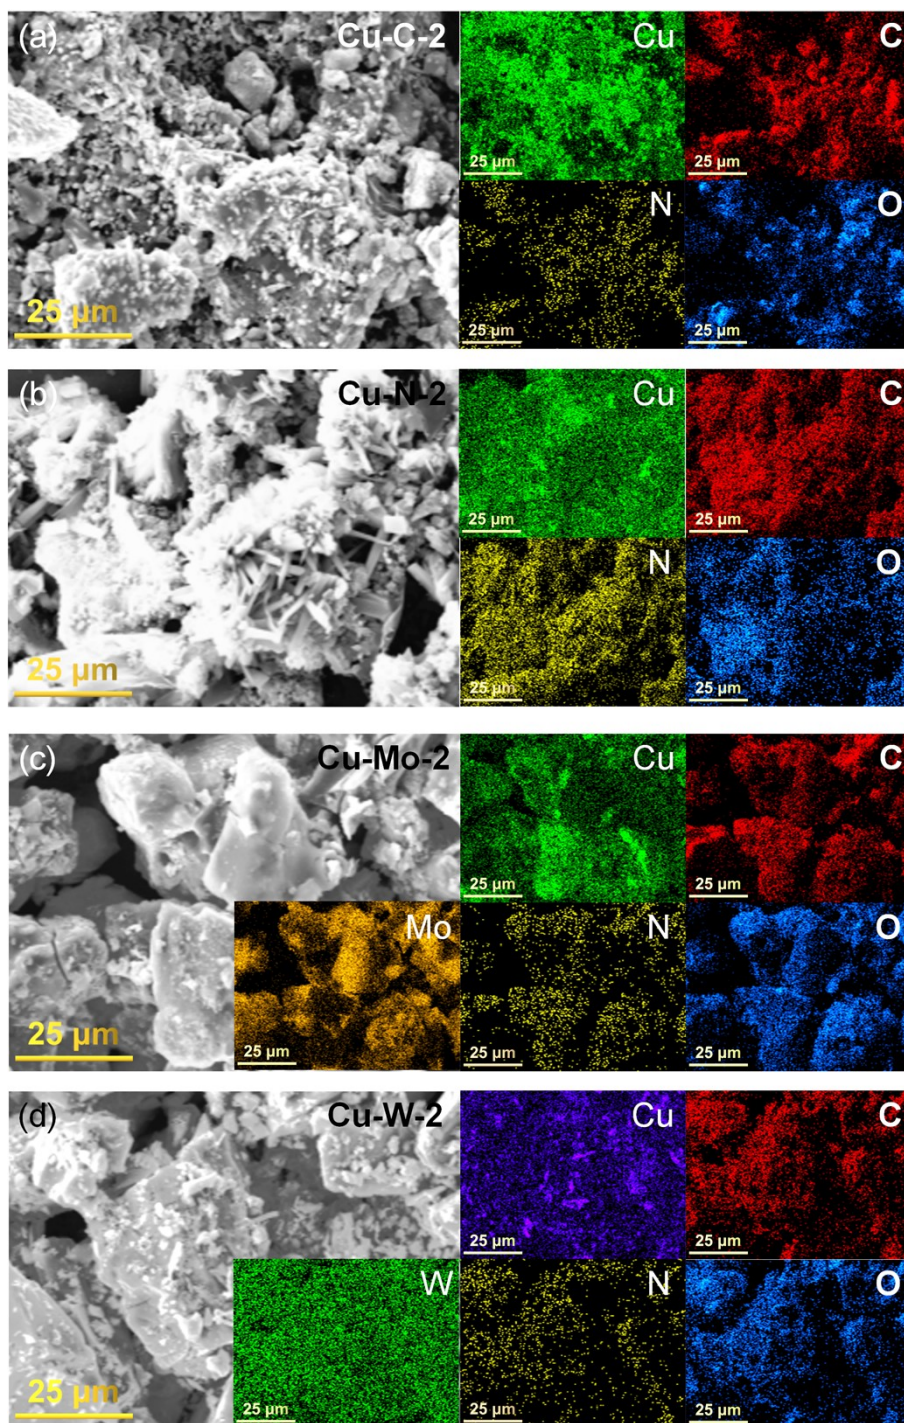

**Fig. S1** Typical SEM images and corresponding element mappings of Cu-C-2 (a), Cu-N-2 (b), Cu-Mo-2 (c), Cu-W-2 (d).

## Supporting Information

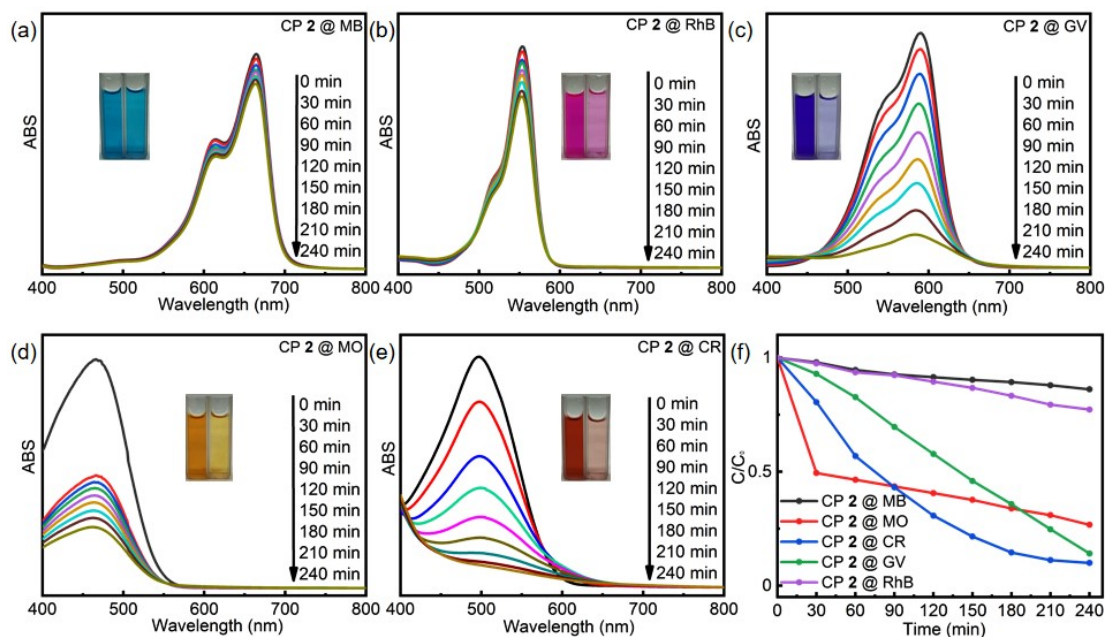

**Fig. S2** UV-vis spectra of MB (a), RhB (b), GV (c), MO (d), and CR (e) solutions which were recorded after photocatalytic degradation had been performed for different lengths of time with CP 2. (f) The photodegradation rates of MB, RhB, MO, CR and GV at different time points during exposure to CP 2.

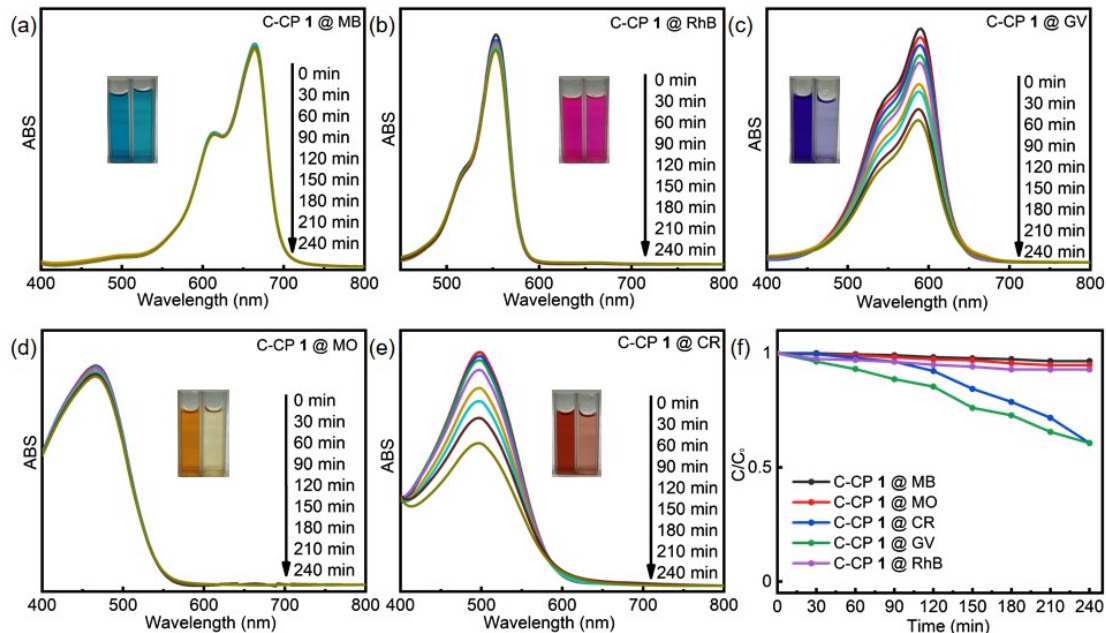

**Fig. S3** UV-vis spectra of MB (a), RhB (b), GV (c), MO (d), and CR (e) solutions which were recorded after photocatalytic degradation had been performed for different lengths of time with C-CP 1. (f) The photodegradation rates of MB, RhB, MO, CR and GV at different time points during exposure to C-CP 1.

## Supporting Information

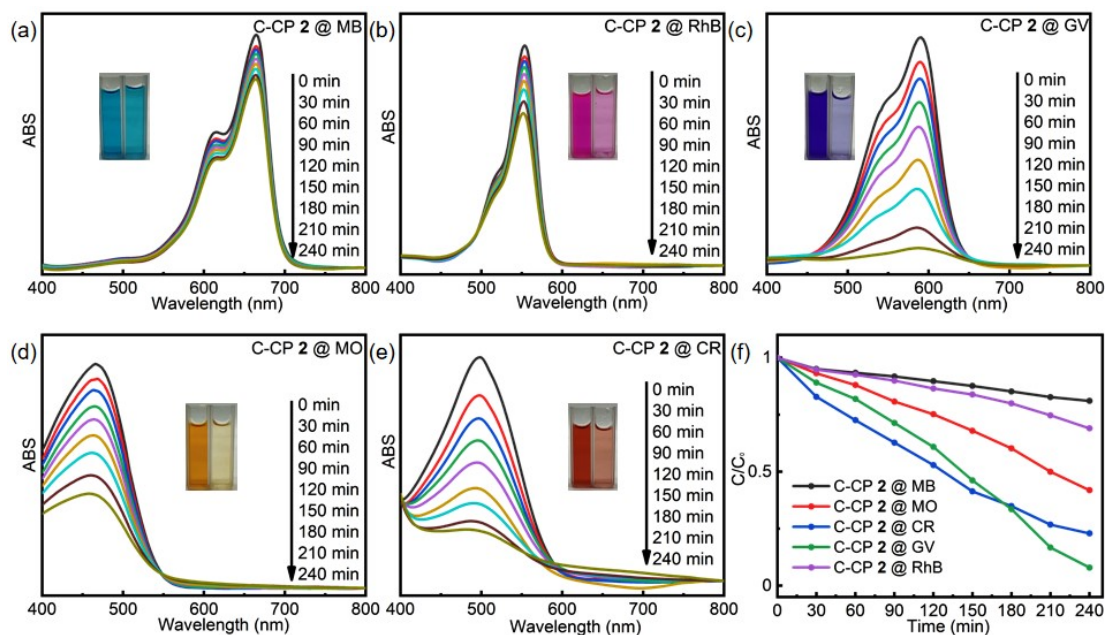

**Fig. S4** UV-vis spectra of MB (a), RhB (b), GV (c), MO (d), and CR (e) solutions which were recorded after photocatalytic degradation had been performed for different lengths of time with C-CP 2. (f) The photodegradation rates of MB, RhB, MO, CR and GV at different time points during exposure to C-CP 2.

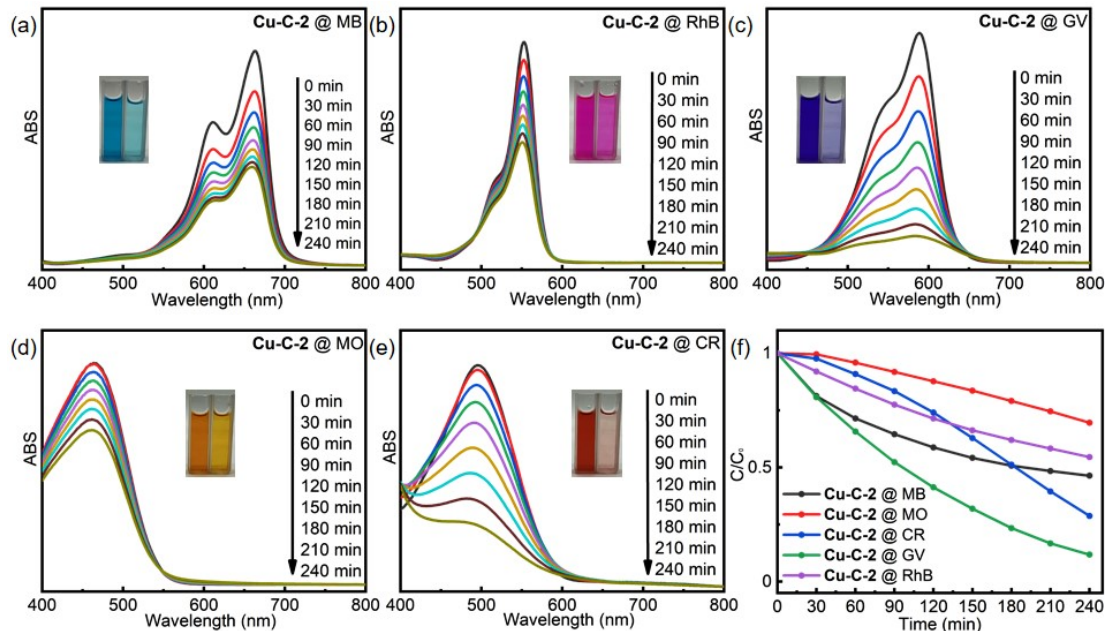

**Fig. S5** UV-vis spectra of MB (a), RhB (b), GV (c), MO (d), and CR (e) solutions which were recorded after photocatalytic degradation had been performed for different lengths of time with Cu-C-2. (f) The photodegradation rates of MB, RhB, MO, CR and GV at different time points during exposure to Cu-C-2.

## Supporting Information

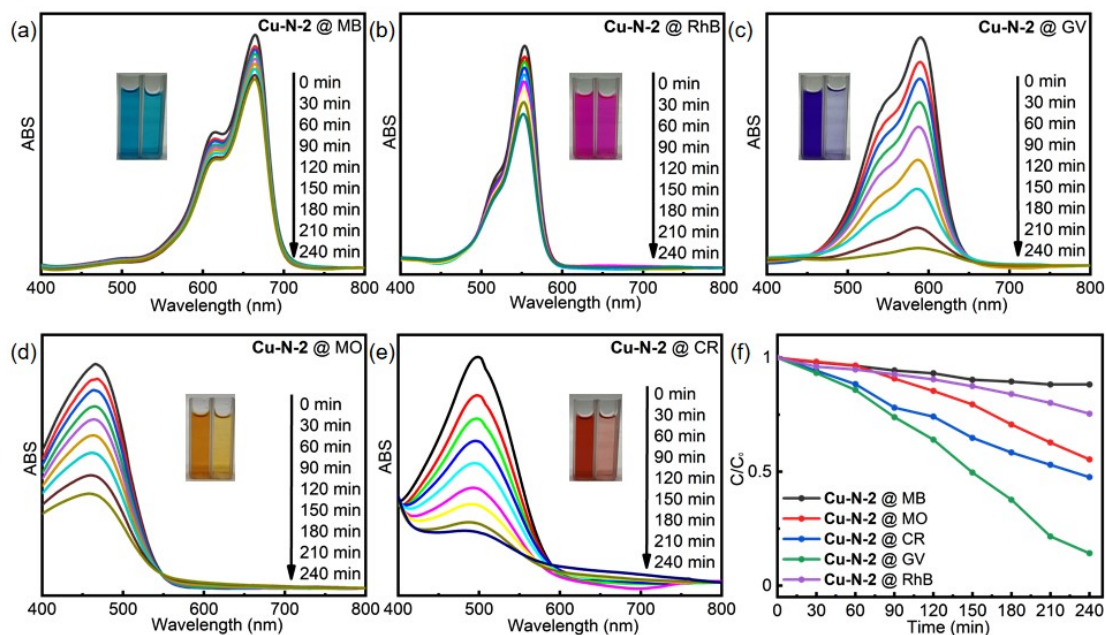

**Fig. S6** UV-vis spectra of MB (a), RhB (b), GV (c), MO (d), and CR (e) solutions which were recorded after photocatalytic degradation had been performed for different lengths of time with **Cu-N-2**. (f) The photodegradation rates of MB, RhB, MO, CR and GV at different time points during exposure to **Cu-N-2**.

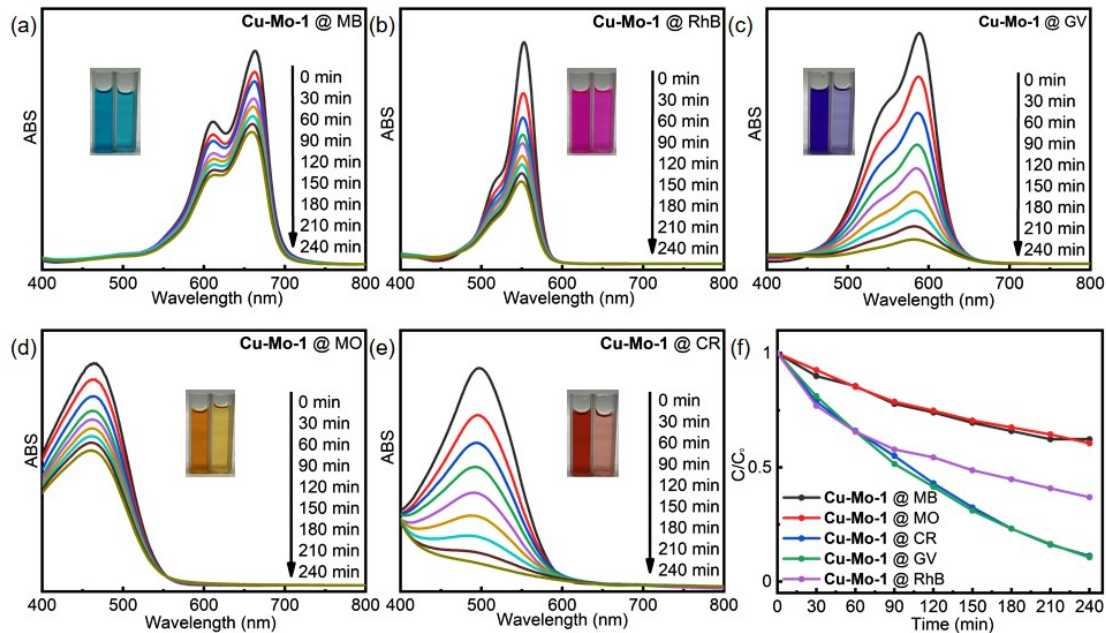

**Fig. S7** UV-vis spectra of MB (a), RhB (b), GV (c), MO (d), and CR (e) solutions which were recorded after photocatalytic degradation had been performed for different lengths of time with **Cu-Mo-1**. (f) The photodegradation rates of MB, RhB, MO, CR and GV at different time points during exposure to **Cu-Mo-1**.

## Supporting Information

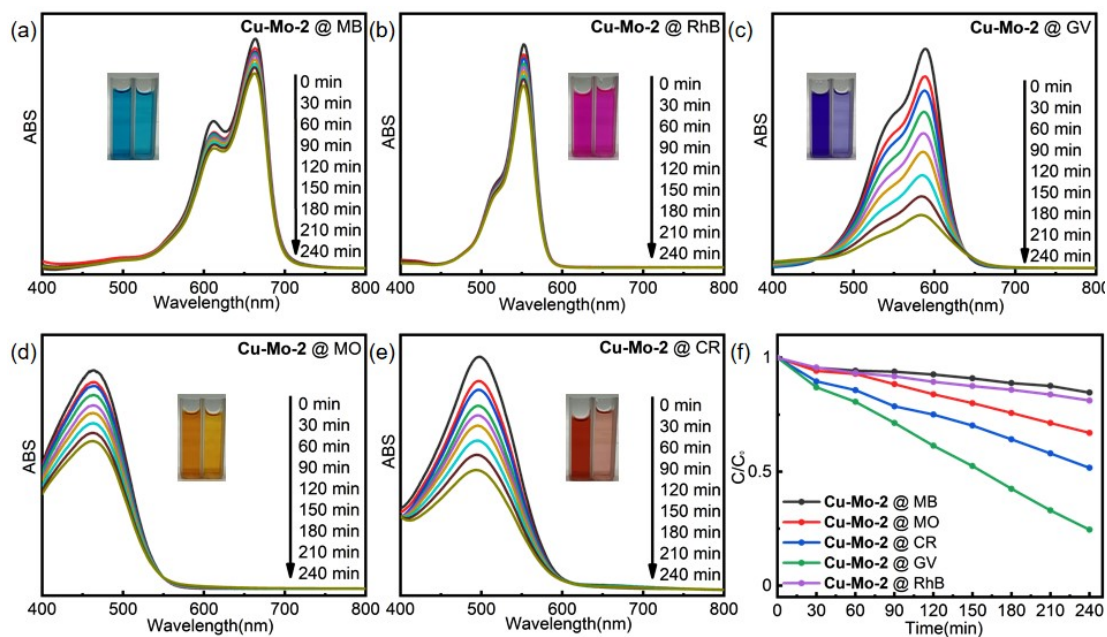

**Fig. S8** UV-vis spectra of MB (a), RhB (b), GV (c), MO (d), and CR (e) solutions which were recorded after photocatalytic degradation had been performed for different lengths of time with **Cu-Mo-2**. (f) The photodegradation rates of MB, RhB, MO, CR and GV at different time points during exposure to **Cu-Mo-2**.

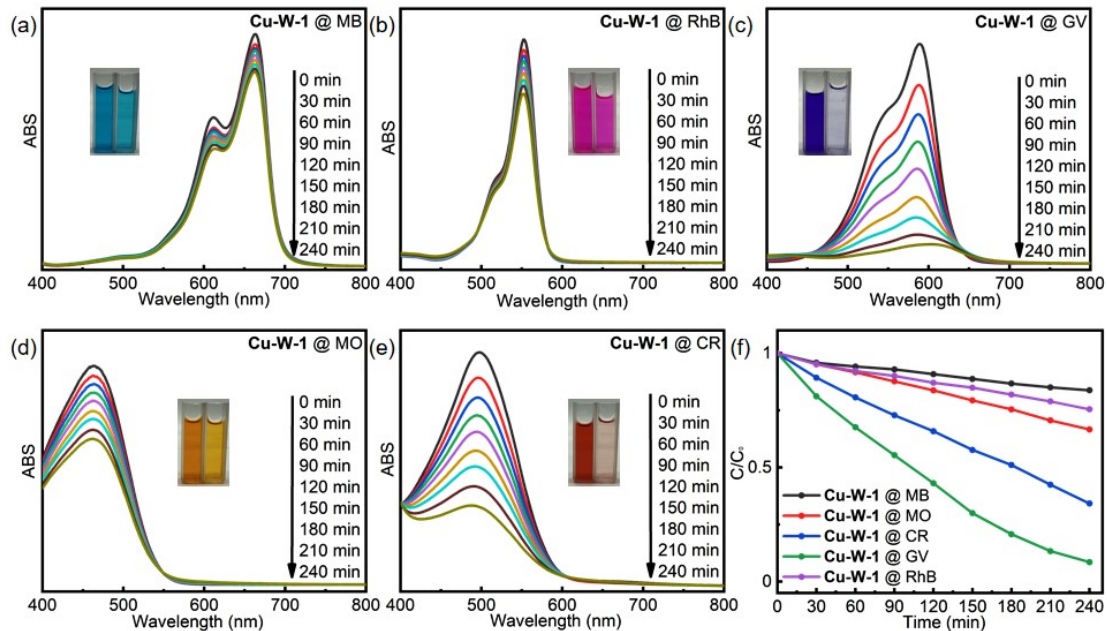

**Fig. S9** UV-vis spectra of MB (a), RhB (b), GV (c), MO (d), and CR (e) solutions which were recorded after photocatalytic degradation had been performed for different lengths of time with **Cu-W-1**. (f) The photodegradation rates of MB, RhB, MO, CR and GV at different time points during exposure to **Cu-W-1**.



## Supporting Information

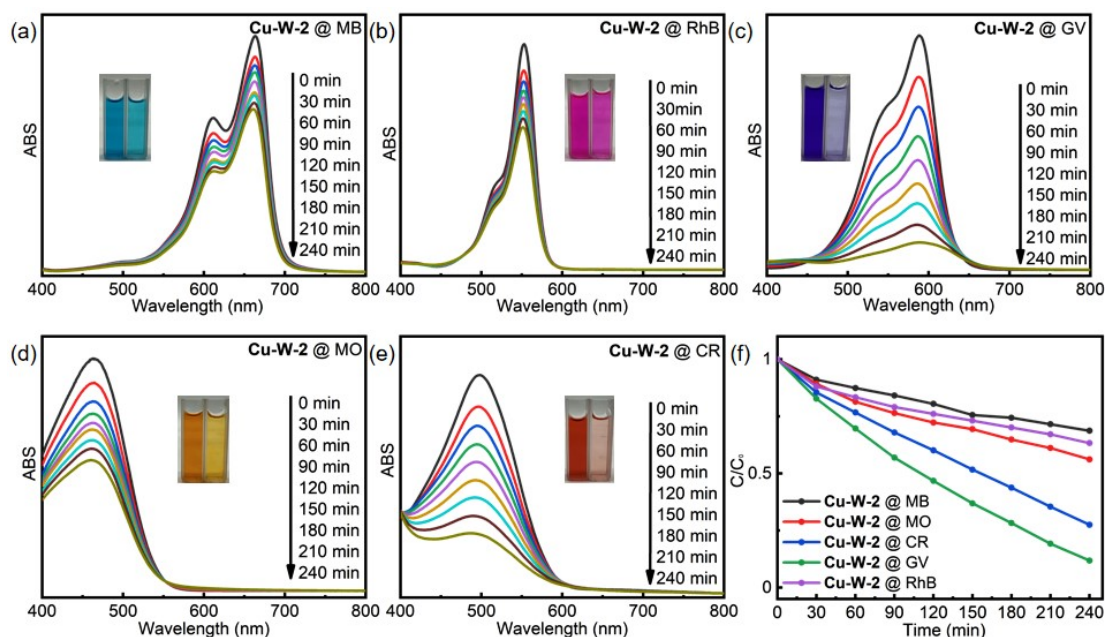

**Fig. S10** UV-vis spectra of MB (a), RhB (b), GV (c), MO (d), and CR (e) solutions which were recorded after photocatalytic degradation had been performed for different lengths of time with **Cu-W-2**. (f) The photodegradation rates of MB, RhB, MO, CR and GV at different time points during exposure to **Cu-W-2**.

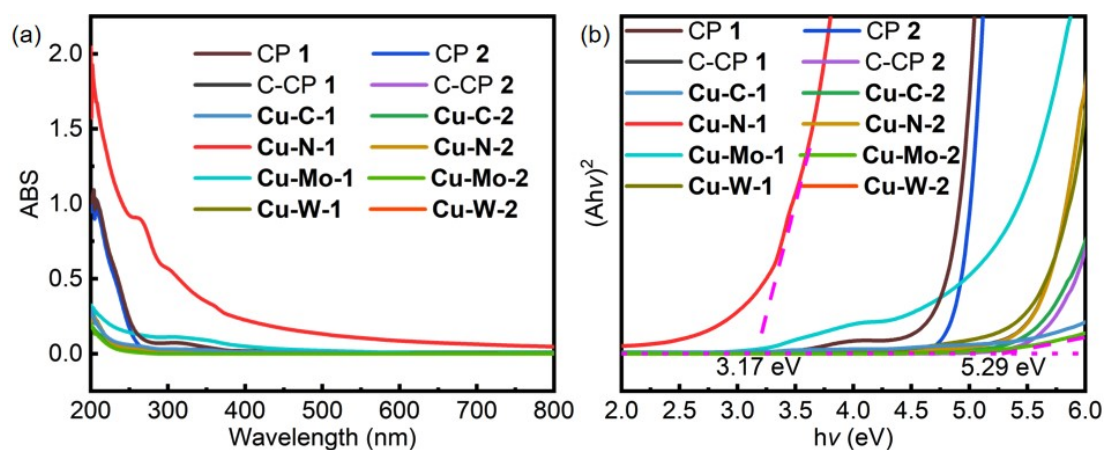

**Fig. S11** (a) UV-vis absorption spectra of the Cu-CPs, CP-derived and CP-doping-derived structures; (b) Tauc's plots of the Cu-CPs, CP-derived and CP-doping-derived structures.

## Supporting Information

### S1. Pseudo-first-order kinetics.

These calculations were performed via equations (S1) and (S2):

$$\ln(C_0/C_t) = kt \quad (\text{S1})$$

$$t_{1/2} = \frac{\ln 2}{k} \quad (\text{S2})$$

where  $C_0$  represents the initial concentration of dye ( $\text{mg L}^{-1}$ ),  $C_t$  is the residual concentration of dye at time  $t$  (min),  $k$  denotes the pseudo-first-order rate constant ( $\text{min}^{-1}$ ), and  $t_{1/2}$ (min) represents the half-life period of the reaction.

### S2. Pseudo-second-order kinetics.

These calculations were performed via equations (S3):

$$t/C_t = 1/(kC_t^2) + t/C_0 \quad (\text{S3})$$

where  $C_0$  represents the initial concentration of dye ( $\text{mg L}^{-1}$ ),  $C_t$  is the residual concentration of dye at time  $t$  (min), and  $k$  denotes the pseudo-second-order rate constant ( $\text{L mg}^{-1} \text{min}^{-1}$ ).

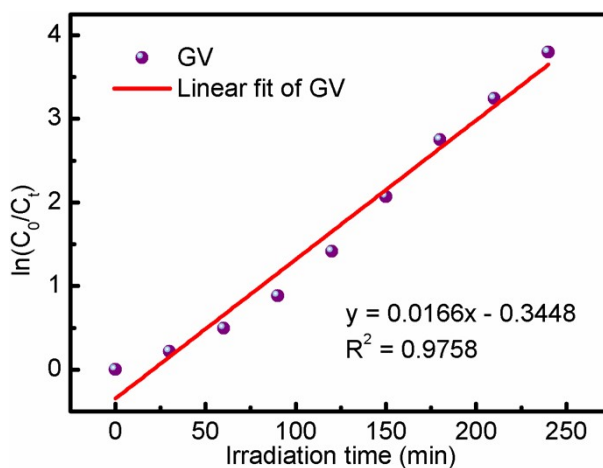

(a)

## Supporting Information

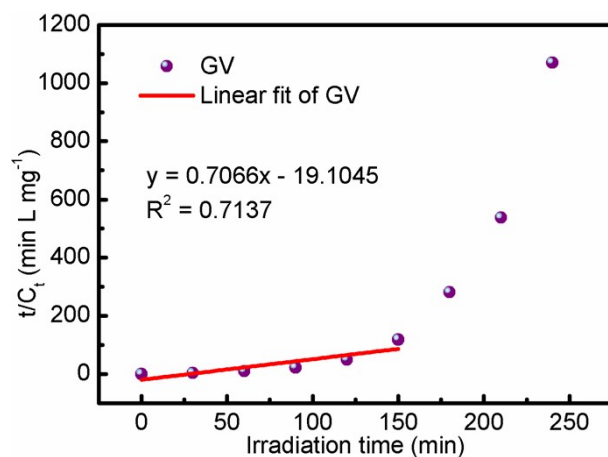

(b)

**Fig. S12** (a) Pseudo-first-order plots with respect to time for **Cu-N-1** in GV solution;  
(b) Pseudo-second-order plots with respect to time for **Cu-N-1** in GV solution.

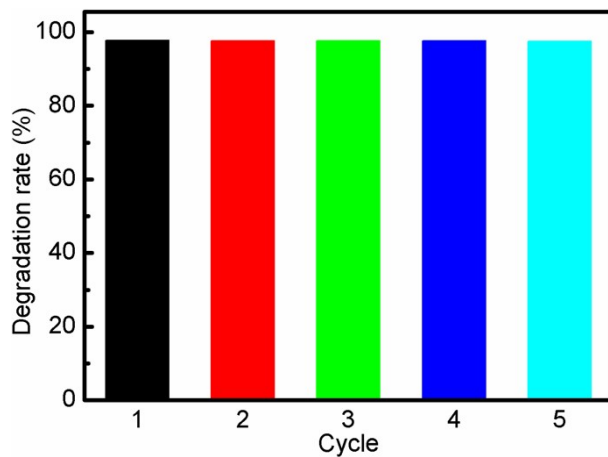

**Fig. S13** The reproducibility of the photocatalyst **Cu-N-1** for GV.

## Supporting Information

### S3. Supplementary X-ray crystallography

First, the residual density plot of CP **2** has been shown in Fig. S14. The yellow balls of Q1–Q5 (residual peak <1) are revealed in ablow residual density plot. Second, the phenomenon of “over-assigned” Cu atom (Fig. S15) is a “crystallographic artifact”, which is due to insufficient absorption correction. Thrid, we have measured the inductively coupled plasma spectrometer (ICP), X-ray photoelectron spectroscopy (XPS) and X-ray fluorescence (XRF) for CP **2** to verify the structural composition (Table S6). Moreover, the PXRD pattern for CP **2** was in agreement with the corresponding simulated one (Fig. 3d), indicating the phase purity of the sample and verifying the existence of Cu and the accuracy of SCXRD. Furthermore, there were only five elements such as Cu, C, N, O and H in the reactants, while there was nothing present at this site as well.

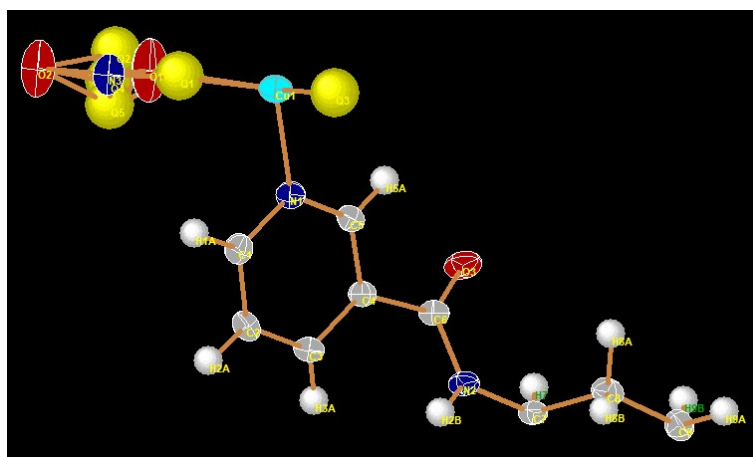

**Fig. S14** The residual density plot of CP **2** (The yellow balls of Q1–Q5 (residual peak <1) are revealed in ablow residual density plot.).

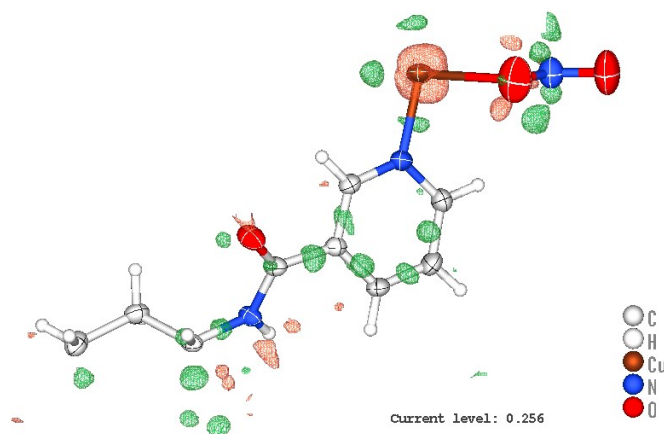

**Fig. S15** The assigned density plot of CP **2**.

## Supporting Information

**Table S6** The elemental analysis and structural composition of CP 2.

| Element | ICP (%) | XPS (%) | XRF (%) | Theoretical value (%) |
|---------|---------|---------|---------|-----------------------|
| Cu      | 14.14   | 14.07   | 14.11   | 14.12                 |
| C       | 48.00   | 48.04   | 48.03   | 48.05                 |
| N       | 15.56   | 15.58   | 15.55   | 15.57                 |
| O       | 17.82   | 17.80   | 17.77   | 17.78                 |
